# Supplementary material for: Developing criteria for evaluation of geroprotectors as a key stage toward translation to the clinic
Source: PubMed Central journal article supplement (PMC4854916; doi:10.1111/acel.12463), 2016-03-11
Supplement: ACEL-15-407-s001.pdf [file ACEL-15-407-s001.pdf]

**Table 1** Summary of the effects on lifespan, healthspan, and potential side effects of the pharmacological geroprotector candidates, ordered on the base of evolutionary conservation of lifespan effects in different models

| Geroprotector Candidate              | Primary selection criteria                               |      |       |         |                                        |                   |                    |               |                        |                 |              | Affects aging-associated diseases |                                             |          |        |                                   |             |                  |               |                     |
|--------------------------------------|----------------------------------------------------------|------|-------|---------|----------------------------------------|-------------------|--------------------|---------------|------------------------|-----------------|--------------|-----------------------------------|---------------------------------------------|----------|--------|-----------------------------------|-------------|------------------|---------------|---------------------|
|                                      | Reproducibility of anti-aging effect in different models |      |       |         | Amelioration of human aging biomarkers |                   |                    |               |                        |                 | Low toxicity | Low risk side effects             | Quality of life. Improvement of functioning |          |        | Affects aging-associated diseases |             |                  |               |                     |
|                                      | Yeast                                                    | Worm | Flies | Rodents | Anti Amlloid                           | Anti Inflammation | Anti hyperglycemia | Antioxidation | Improves Lipid Profile | Neuroprotection |              |                                   | Improve Cutaneous Aging                     | Physical | Mental | Emotional                         | Anti Cancer | Anti Atherogenic | Anti Diabetic | Anti Cardiovascular |
| Acarbose                             |                                                          |      |       | +       |                                        | +                 | +                  |               | +                      |                 |              | +                                 | +                                           | +        |        |                                   |             | +                | +             |                     |
| Deprenyl                             |                                                          |      |       | +       |                                        |                   |                    |               | +                      |                 |              | +                                 | +                                           |          | +      | +                                 |             |                  |               |                     |
| D-glucosamine                        |                                                          | +    |       | +       |                                        | +                 |                    |               |                        | +               |              | +                                 | +                                           | +        |        | +                                 | +           |                  |               |                     |
| Dihydroergocristine methanesulfonate |                                                          | +    |       |         |                                        |                   |                    |               | +                      |                 |              | +                                 | +                                           |          |        |                                   |             |                  |               |                     |
| Ellagic acid                         |                                                          | +    |       |         | +                                      | +                 |                    |               |                        | +               | +            | +                                 | +                                           |          | +      | +                                 | +           | +                | +             |                     |
| Glutathione                          |                                                          | +    |       |         |                                        |                   |                    | +             |                        |                 |              | +                                 | +                                           |          |        |                                   |             |                  |               |                     |
| Metformin                            |                                                          | +    | 0     | +       |                                        | +                 | +                  |               | +                      | +               |              | +                                 | +                                           | +        | +      | +                                 | +           | +                | +             |                     |
| Rapamycin                            | +                                                        |      | +     | +       | +                                      | +                 |                    |               |                        | +               |              | +                                 | -                                           |          | +      | +                                 |             |                  | +             |                     |
| Spermidine                           | +                                                        | +    | +     |         |                                        |                   |                    | +             |                        |                 |              | +                                 | +                                           |          |        |                                   |             |                  | +             |                     |
| Tyrosol                              |                                                          | +    |       |         |                                        | +                 |                    |               |                        |                 |              | +                                 | +                                           | +        |        |                                   |             |                  | +             |                     |
| Vinpocetine                          |                                                          | +    |       |         |                                        |                   |                    |               |                        | +               |              | +                                 | +                                           |          |        |                                   |             |                  |               | +                   |

+ - positive effect; 
 - - negative effect; 
 0 - no effect; 
 empty cell - no data available

**References:**

**Acarbose** (Hotta *et al.* 1993; Hanefeld & Schaper 2008; Nakhaee & Sanjari 2013; Harrison *et al.* 2014; Holman *et al.* 2014; Wang *et al.* 2014; McCarty & DiNicolantonio 2015)  
**Deprenyl** (Kitani *et al.* 1993; ThyagaRajan *et al.* 2000; Tatton *et al.* 2003)  
**D-glucosamine** (Hua *et al.* 2002; Park *et al.* 2009; Kaida *et al.* 2014; Weimer *et al.* 2014; Kongtharvonskul *et al.* 2015)  
**Dihydroergocristine methanesulfonate** (Ye *et al.* 2014)  
**Ellagic acid** (Feng *et al.* 2009; Saul *et al.* 2011; Dhingra & Chhillar 2012; Muthenna *et al.* 2012; Uzar *et al.* 2012; Kannan & Quine 2013; Panchal *et al.* 2013; Ding *et al.* 2014; El-Garhy *et al.* 2014; Zhang *et al.* 2014)  
**Glutathione** (Shibamura *et al.* 2009; Veljkovic *et al.* 2012)  
**Metformin** (Slack *et al.* 2012; Cabreiro *et al.* 2013; Martin-Montalvo *et al.* 2013; Eriksson & Nystrom 2014; Gong *et al.* 2014; Guo *et al.* 2014; Lee *et al.* 2014; Ohira *et al.* 2014; Patil *et al.* 2014; Ashabi *et al.* 2015)  
**Rapamycin** (Alvers *et al.* 2009; Gadioli *et al.* 2009; Moskalev & Shaposhnikov 2010; Robida-Stubbs *et al.* 2012; Cai & Yan 2013; Flynn *et al.* 2013; Ashworth & Wu 2014; Ehninger *et al.* 2014; Fok *et al.* 2014; Xu *et al.* 2014; Song *et al.* 2015)  
**Spermidine** (Eisenberg *et al.* 2009; LaRocca *et al.* 2013)  
**Tyrosol** (Owen *et al.* 2000; Canuelo *et al.* 2012; Wang *et al.* 2013; Chandramohan *et al.* 2015)  
**Vinpocetine** (Herrera-Mundo & Sitges 2013; Ye *et al.* 2014)
